# Supplementary material for: Beneficial effect of cerium excess on in situ grown Sr0.86Ce0.14FeO3–CeO2 thermocatalysts for the degradation of bisphenol A
Source: Royal Society of Chemistry journal article supplement (doi:10.1039/d3ra03404f), 2023-01-01
Supplement: d3ra03404f1.pdf [file d3ra03404f1.pdf]

## SUPPORTING INFORMATION

### **Beneficial effect of cerium excess on the *in-situ* grown $\text{Sr}_{0.86}\text{Ce}_{0.14}\text{FeO}_3\text{-CeO}_2$ thermocatalysts for the degradation of Bisphenol A**

Martin B. Østergaard<sup>1,\*</sup>, Francesca Deganello<sup>2,\*</sup>, Valeria La Parola<sup>2</sup>, Leonarda F. Liotta<sup>2</sup>, Vittorio Boffa<sup>1</sup>,

Mads K. Jørgensen<sup>1</sup>

<sup>1</sup>Center for Membrane Technology, Department of Chemistry and Bioscience, Aalborg University, 9220 Aalborg East,  
Denmark

<sup>2</sup>Instituto per lo Studio dei Materiali Nanostrutturati, Consiglio Nazionale delle Ricerche, Via Ugo La Malfa 153,  
90146, Palermo, Italy

\*Correspondence: [mbo@bio.aau.dk](mailto:mbo@bio.aau.dk) (M.B.Ø.), [francesca.deganello@cnr.it](mailto:francesca.deganello@cnr.it) (F.D.)

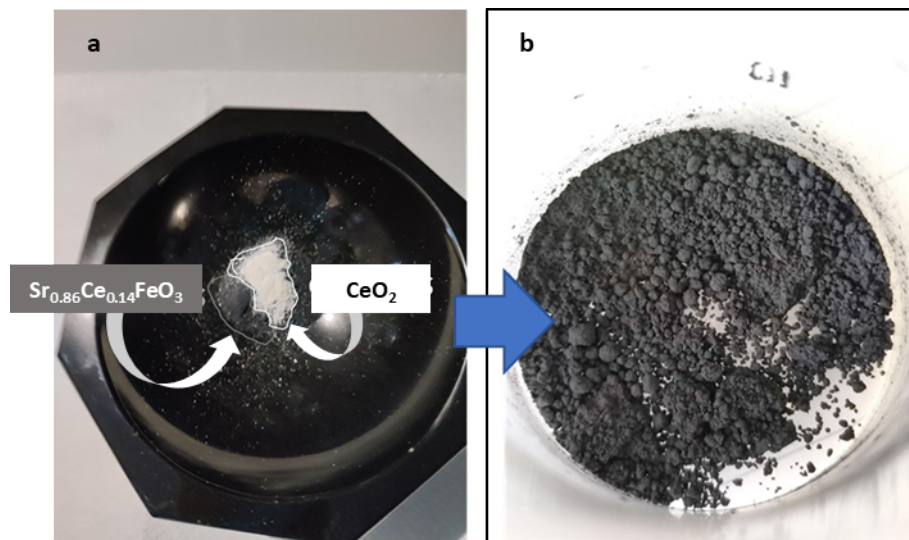

Figure S1. Pictures of the preparation of the mechanical mixture MM between  $\text{Sr}_{0.86}\text{Ce}_{0.14}\text{FeO}_3$  (*Ce0*) and  $\text{CeO}_2$  before mixing (a) and after mixing (b)

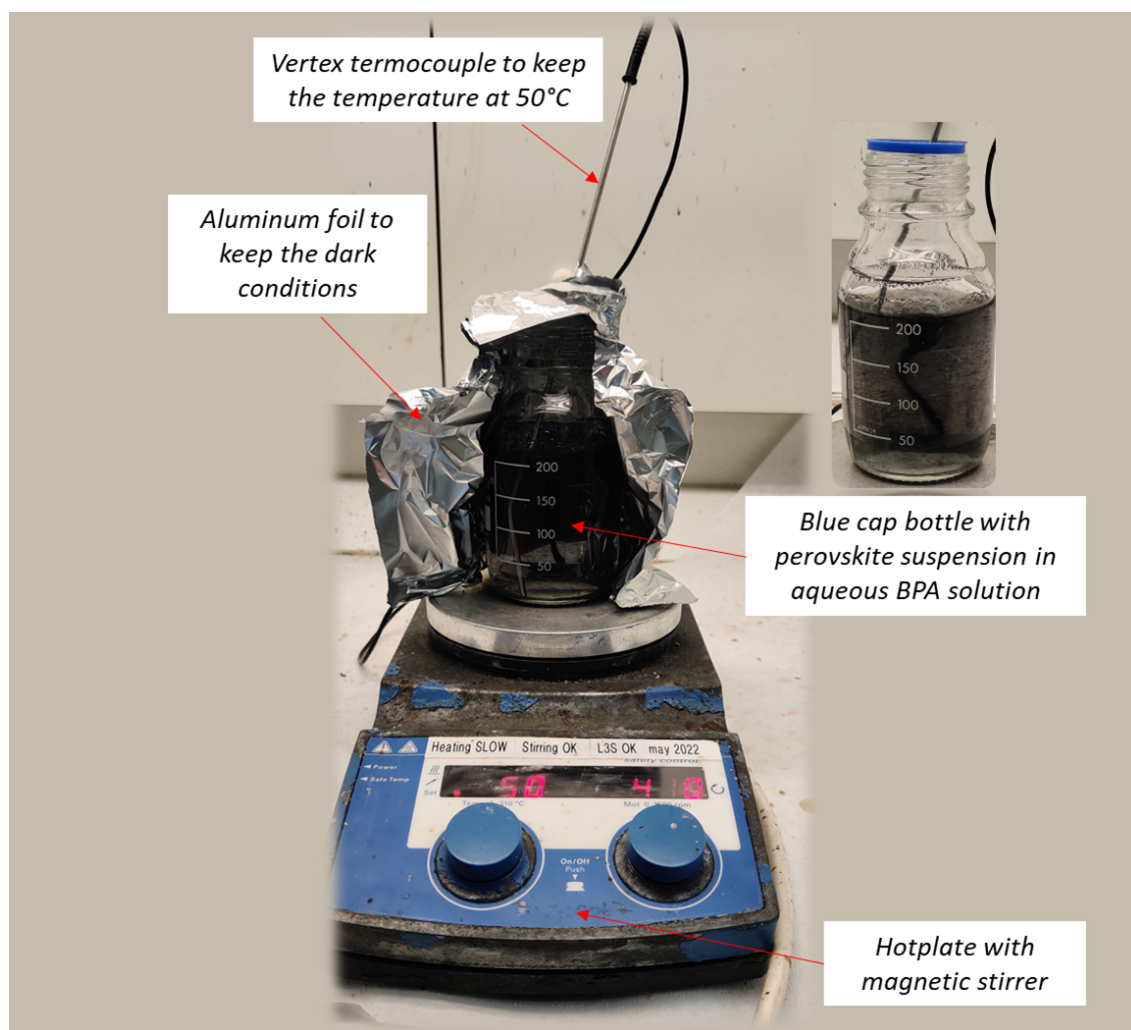

**Figure S2. Pictorial description of the thermocatalytic batch experiment.**

**Table S1. Main structural results obtained from Rietveld refinement of the XRD data with relative standard deviations and reliability factors: phase composition of the powders and space group, unit cell lengths, cell volume, crystallite size,**

| Sample name            | Phase Composition (wt%)           | Structure type       | Cell Lengths (Å)                                      | Cell Volume (Å <sup>3</sup> )   | Crystallite Size (nm) | Microstrain <sup>°</sup> (unitless) | Reliability Factors                    |
|------------------------|-----------------------------------|----------------------|-------------------------------------------------------|---------------------------------|-----------------------|-------------------------------------|----------------------------------------|
| <i>Ce0</i>             | P (100)                           | P m -3 m             | 3.88454 ± 0.0007                                      | 58.616 ± 0.003                  | 369 ± 31              | 3023 ± 100                          | GOF* = 1.43<br>wR <sup>§</sup> = 8.49% |
| <i>Ce5</i>             | P (96.2 ± 0.7)<br>F (3.8 ± 0.1)   | P4/mmm<br>F m -3 m   | 3.8864 ± 0.0001<br>3.8777 ± 0.0002<br>5.4111 ± 0.0006 | 58.570 ± 0.005<br>158.44 ± 0.05 | 315 ± 35<br>69 ± 10   | 3825 ± 164<br>863 ± 970             | GOF = 1.55<br>wR = 9.71%               |
| <i>Ce10</i>            | P (93.2 ± 0.6)<br>F (6.8 ± 0.1)   | P4/mmm<br>F m -3 m   | 3.8887 ± 0.0001<br>3.8799 ± 0.0002<br>5.4112 ± 0.0003 | 58.673 ± 0.005<br>158.45 ± 0.03 | 237 ± 20<br>76 ± 6    | 3990 ± 169<br>1404 ± 505            | GOF = 1.47<br>wR = 8.91%               |
| <i>Ce15</i>            | P (89.4 ± 0.6)<br>F (10.6 ± 0.1)  | P4/mmm<br>F m -3 m   | 3.8892 ± 0.0001<br>3.8799 ± 0.0002<br>5.4133 ± 0.0003 | 58.688 ± 0.005<br>158.63 ± 0.02 | 432 ± 75<br>81 ± 6    | 5240 ± 193<br>2258 ± 398            | GOF = 1.47<br>wR = 8.74%               |
| <i>CeO<sub>2</sub></i> | F (100)                           | F m -3 m             | 5.41177 ± 0.00007                                     | 158.496 ± 0.006                 | 87 ± 1                | 637 ± 62                            | GOF = 1.20<br>wR = 8.11%               |
| <i>MM</i>              | P (89.47 ± 0.5)<br>F (10.5 ± 0.1) | P m -3 m<br>F m -3 m | 3.88535 ± 0.00006<br>5.4116 ± 0.0002                  | 58.653 ± 0.003<br>158.48 ± 0.01 | 352 ± 28<br>76 ± 3    | 2920 ± 99<br>318 ± 247              | GOF = 1.29<br>wR = 7.64%               |

microstrain of the  $Sr_{0.86}Ce_{0.14}FeO_3$  perovskite (P) and  $CeO_2$  fluorite (F) phases.

<sup>°</sup> Microstrain ( $10^6 \cdot \Delta d/d$ ), where d is the distance between symmetry planes and is related to the 2θ angle through the Bragg equation

\* GOF =  $\sum[(I_{obs} - I_{calc})/\sigma]^2$  normalized by the degrees of freedom, which is  $n_{obs} - n_{var}$ , where n is the number of parameters and  $n_{var}$  is the number of refined parameters. It is often called also reduced  $\chi^2$

<sup>§</sup> wR is the weighted profile R factor and is calculated directly from the square root of the quantity minimized, scaled by the weighted intensities. It is often called also  $R_{wp}$ .

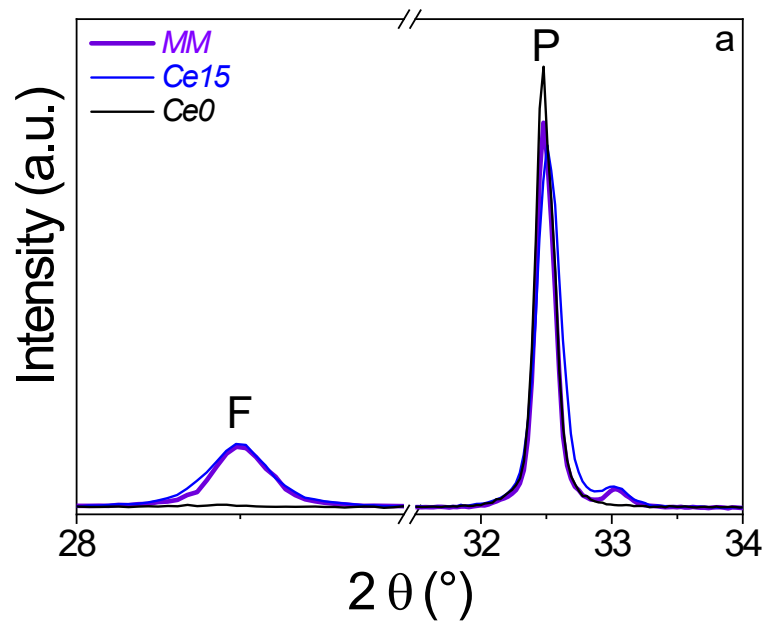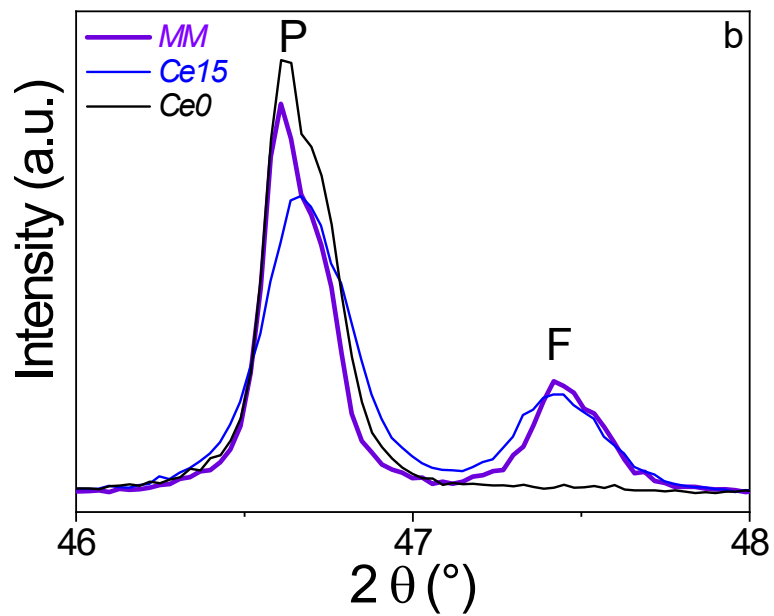

Figure S3. Comparison between XRD pattern of the mechanical mixture, the powder with no cerium excess (*Ce0*) and the powder with the maximum amount of cerium excess (*Ce15*). P and F indicates the perovskite phase and fluorite ceria phase, respectively.

**Table S2. Binding Energy (eV) and, in parenthesis, the relative atomic percentages and speciation of the O1s, Fe2p3/2 and Sr3d5/2 peaks. The binding energy values are given with an error of  $\pm 0.2$  eV, whereas the relative percentages of each component are given with an error of  $\pm 0.5\%$**

| <b>Sample name</b> | <b>O1s</b>                       | <b>Fe2p3/2</b>                  | <b>Sr3d5/2</b>                      |
|--------------------|----------------------------------|---------------------------------|-------------------------------------|
| <b><i>Ce0</i></b>  | 529.3 (55.2%) (O <sub>L</sub> )  | 710.3 (84.7% Fe <sup>3+</sup> ) | 132.7 (100% Sr <sub>L</sub> )       |
|                    | 531.8 (45.8%) (O <sub>OH</sub> ) | 712.6 (15.3% Fe <sup>4+</sup> ) |                                     |
| <b><i>Ce5</i></b>  | 529.2 (39.0%) (O <sub>L</sub> )  | 709.7 (81.9% Fe <sup>3+</sup> ) | 133.1 (64.6% Sr <sub>L</sub> )      |
|                    | 531.4 (61.0%) (O <sub>OH</sub> ) | 712.1 (18.1% Fe <sup>4+</sup> ) | 134.5 (35.4% Sr <sub>OH/CO3</sub> ) |
| <b><i>Ce10</i></b> | 529.2 (38.7%) (O <sub>L</sub> )  | 709.7 (83.3% Fe <sup>3+</sup> ) | 133.0 (84.8% Sr <sub>L</sub> )      |
|                    | 531.6 (62%) (O <sub>OH</sub> )   | 712.1 (16.7% Fe <sup>4+</sup> ) | 134.3 (15.2% Sr <sub>OH/CO3</sub> ) |
| <b><i>Ce15</i></b> | 529.3 (42.0%) (O <sub>L</sub> )  | 709.7 (84.5% Fe <sup>3+</sup> ) | 132.9 (61.8% Sr <sub>L</sub> )      |
|                    | 531.6 (58%) (O <sub>OH</sub> )   | 711.5 (15.5% Fe <sup>4+</sup> ) | 134.2 (38.2% Sr <sub>OH/CO3</sub> ) |
| <b><i>MM</i></b>   | 529.5 (58.8%) (O <sub>L</sub> )  | 710.2 (88.1% Fe <sup>3+</sup> ) | 132.2 (82.1% Sr <sub>L</sub> )      |
|                    | 531.8 (41%) (O <sub>OH</sub> )   | 712.3 (11.9% Fe <sup>4+</sup> ) | 133.9 (17.9% Sr <sub>OH/CO3</sub> ) |

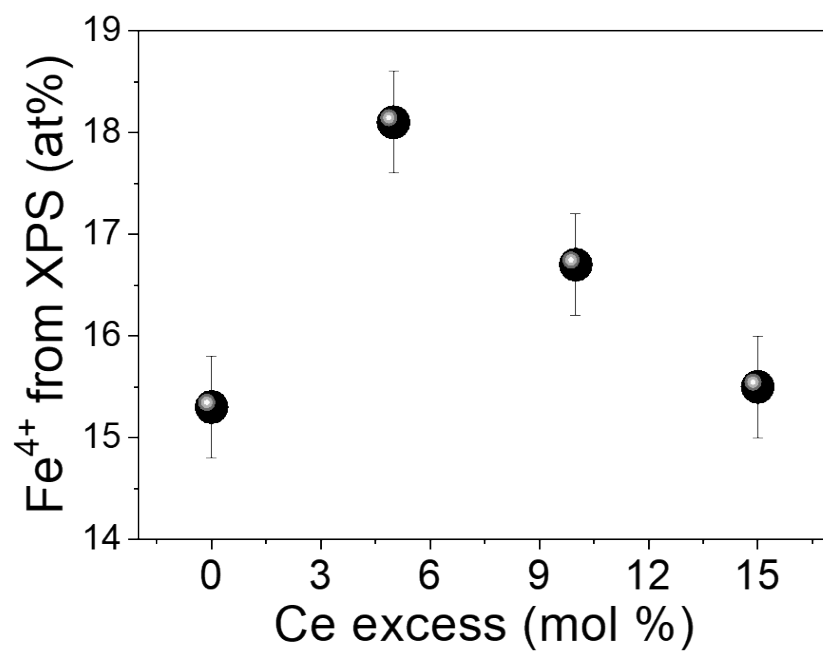

Figure S4. Trend of the Fe<sup>4+</sup> calculated from XPS results (Table S2) with nominal cerium excess.

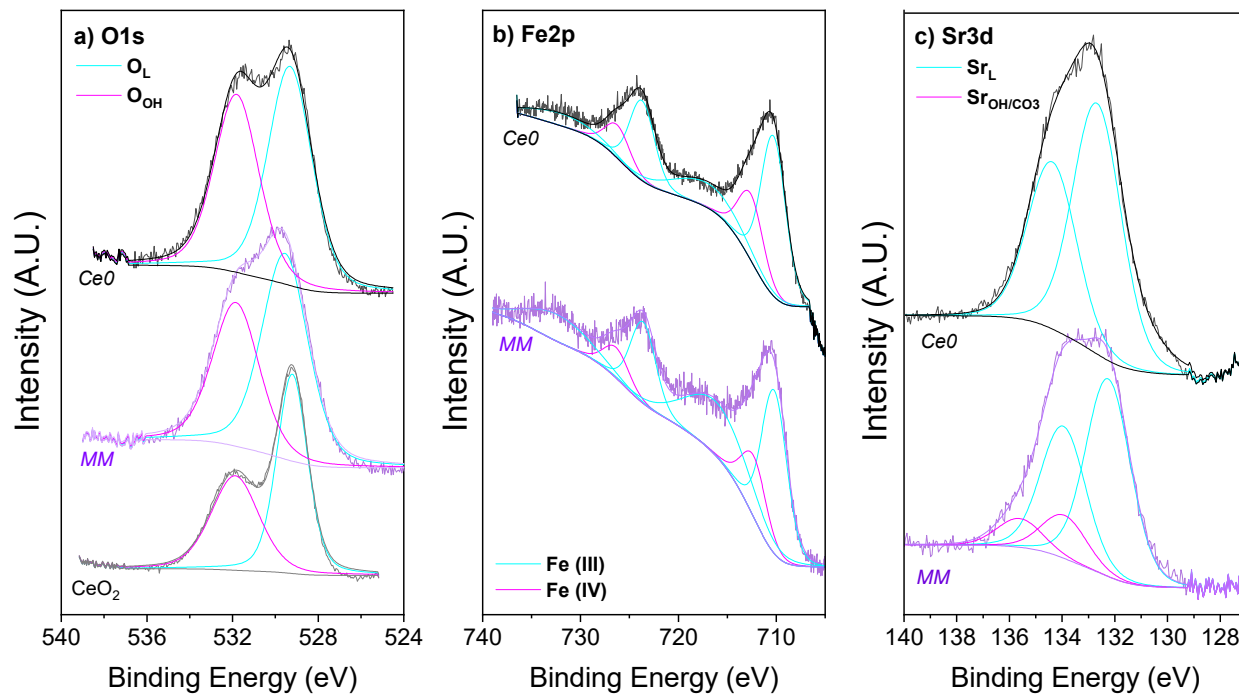

Figure S5. X ray photoelectron Spectroscopy of *CeO*, *MM* and *CeO<sub>2</sub>* samples: a) O1s region, b) Fe2p region and c) Sr3d region.  $O_L$  and  $O_{OH}$  represent the lattice oxygen and the surface oxygen, respectively, whereas  $Sr_L$  and  $Sr_{OH/CO_3}$  represent the Sr in the perovskite structure and the Sr in the  $SrCO_3$  structure, respectively.



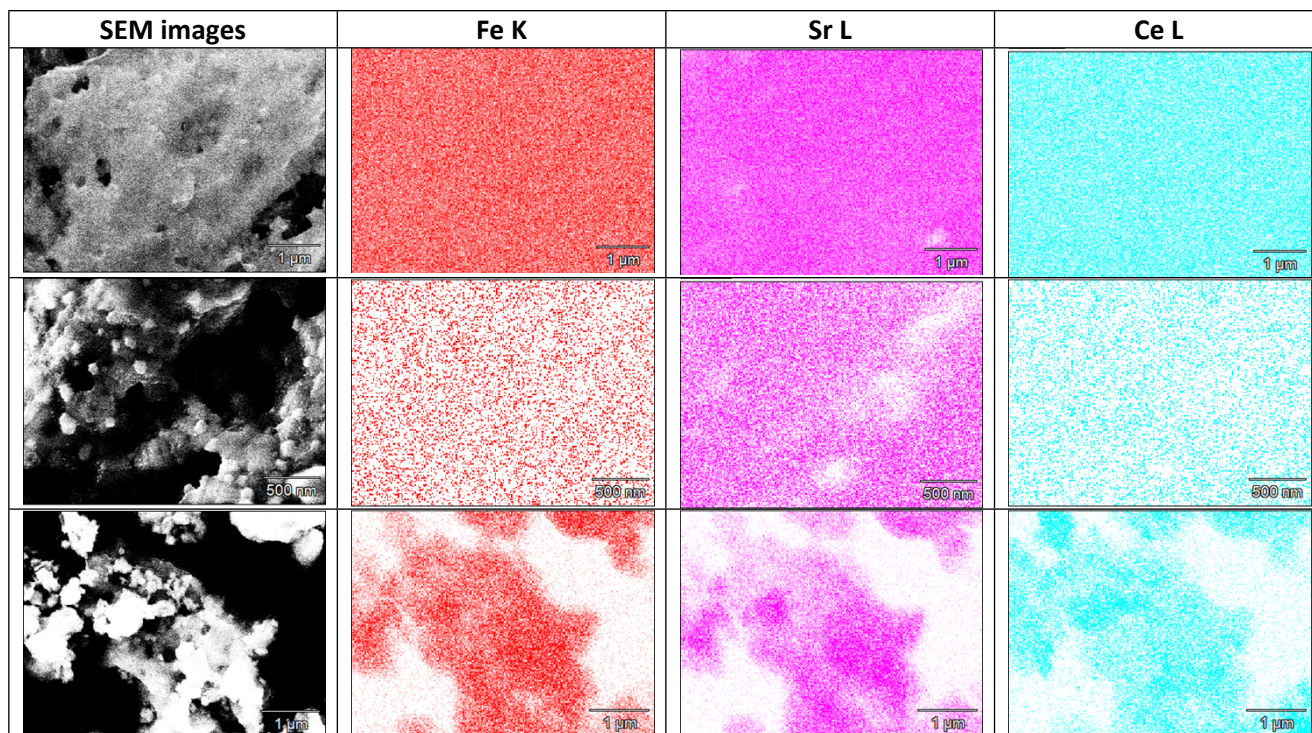

Figure S6. EDX mapping of *Ce0* (top row), *Ce15* (middle row), and *MM* (bottom row).

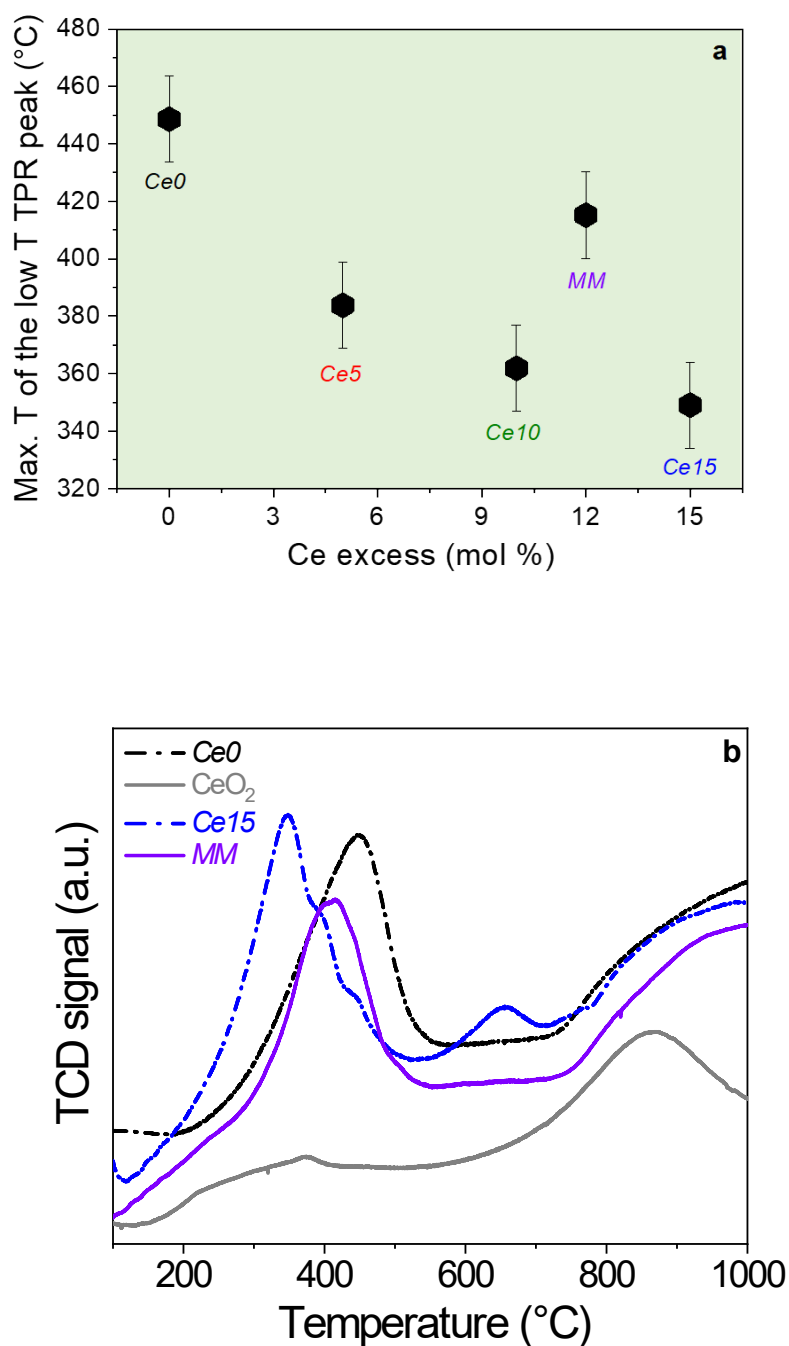

Figure S7. a) Trend of the maximum temperature (Tmax) of the low temperature TPR peak with cerium excess and comparison with the Tmax of *MM* sample; b) TPR profiles of *MM* and CeO<sub>2</sub> powders in comparison with *Ce0* and *Ce15*.

#### Discussion about TPR analysis of Figure 7

Figure S7 shows the TPR profiles of pure CeO<sub>2</sub> and of the mechanical mixture (*MM*) in comparison with *Ce0* and *Ce15*. For pure ceria reduction two main peaks at 375 and 870 °C were detected, that were

assigned to the surface and bulk reduction of  $\text{CeO}_2$ , respectively. Based on the  $\text{H}_2$  consumption, the extent of ceria reduction (surface + bulk) was estimated as 73%. Based on the chemical composition of the *MM*, namely 89.4 wt.% of *Ce0* + 10.6 wt.% of  $\text{CeO}_2$  and taking into account the extent of surface and bulk reduction of ceria only, the  $\text{mmol H}_2 \text{ g}^{-1}$  that should be consumed for ceria were calculated (namely 0.0529  $\text{mmol g}^{-1}$  for surface reduction and 0.1909  $\text{mmol g}^{-1}$  for bulk reduction) and subtracting them from the consumption at low and high temperature, the  $\text{H}_2$  uptake due to *Ce0* reduction in the low and temperature range, was estimated, while the  $\text{H}_2$  consumption between 550-700 °C (0.28  $\text{mmol g}^{-1}$ ) was ascribed to the reduction of  $\text{Ce}^{4+}$  into the lattice of *Ce0*. There is a good correspondence between the reduction curve of the *MM* in comparison with those of *Ce0* and pure  $\text{CeO}_2$ . Briefly, the reduction profile of the *MM* appears as the result of the overlapping of the two reduction profiles, giving rise to a main reduction peak at relatively low T, at 415 °C that is an intermediate temperature between 375 and 450 °C. Such peak corresponds well to the surface ceria reduction along with to the reduction  $\text{Fe}^{4+}$  to  $\text{Fe}^{3+}$  in the *Ce0* sample. By increasing the temperature, between around 550-700 °C, reduction of  $\text{Ce}^{4+}$  present into the perovskite lattice occurs, then, reduction of ceria bulk (in the pure  $\text{CeO}_2$  phase) and as well the reduction of  $\text{Fe}^{3+}$  to  $\text{Fe}^{2+}$  (in the perovskite *Ce0*), take place, both at around 800-1000 °C. Looking at **Table 2**, and comparing the  $\text{H}_2$  uptake for *Ce15* and for the *MM*, the observed lower consumption (3.43  $\text{mmol H}_2 \text{ g}^{-1}$  for the *MM* versus 4.46  $\text{mmol H}_2 \text{ g}^{-1}$  for *Ce15*) is in agreement with the fact that in the *MM* sample pure ceria was introduced as a separated phase and not *in-situ* together with the perovskite precursors (as instead occurs for *Ce15*) and is reduced to a lower extent with respect to a defective ceria phase as it is formed in the case of *Ce15*. On the other hand, the crystallite size and surface area of pure  $\text{CeO}_2$  phase and the one segregated in the *Ce15* can be different from the crystallite size determined by XRD (see **Table S1**), being the crystallite size of  $\text{CeO}_2$  slightly smaller for the segregated samples compared to the pure  $\text{CeO}_2$ . This defective ceria that is reduced at about 650 °C might well correspond to the poorly crystallized nanostructured phase that was suggested from the structural characterization (see **Figure 1c**).

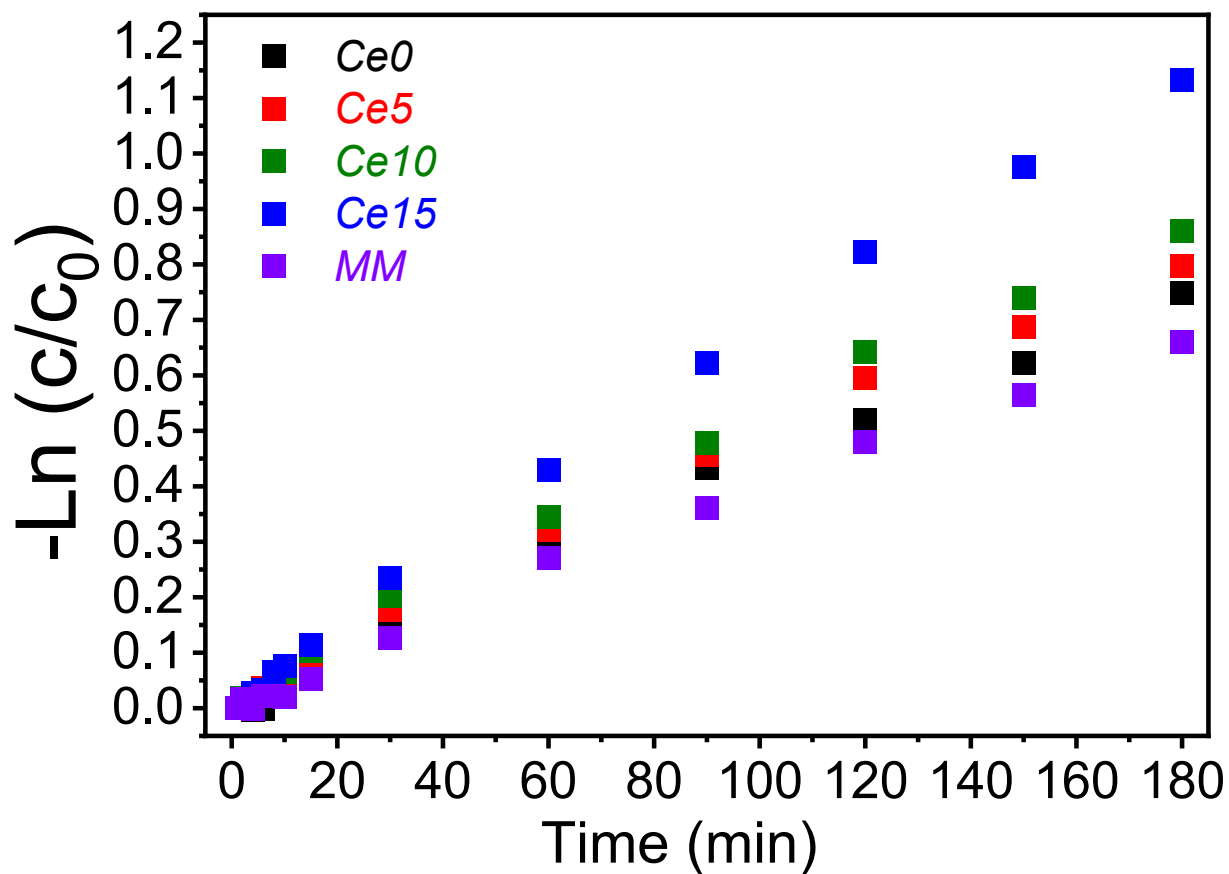

Figure S8. Linearized plots of the abatement of Bisphenol A using Ce-doped  $\text{SrFeO}_3$  with different amount of cerium excess for calculation of kinetic constants
